# Supplementary figures and images for: Methyltransferases of Riboviria
Source: MDPI journal article supplement (doi:10.3390/biom12091247), 2022-09-06

Tree scale: 10

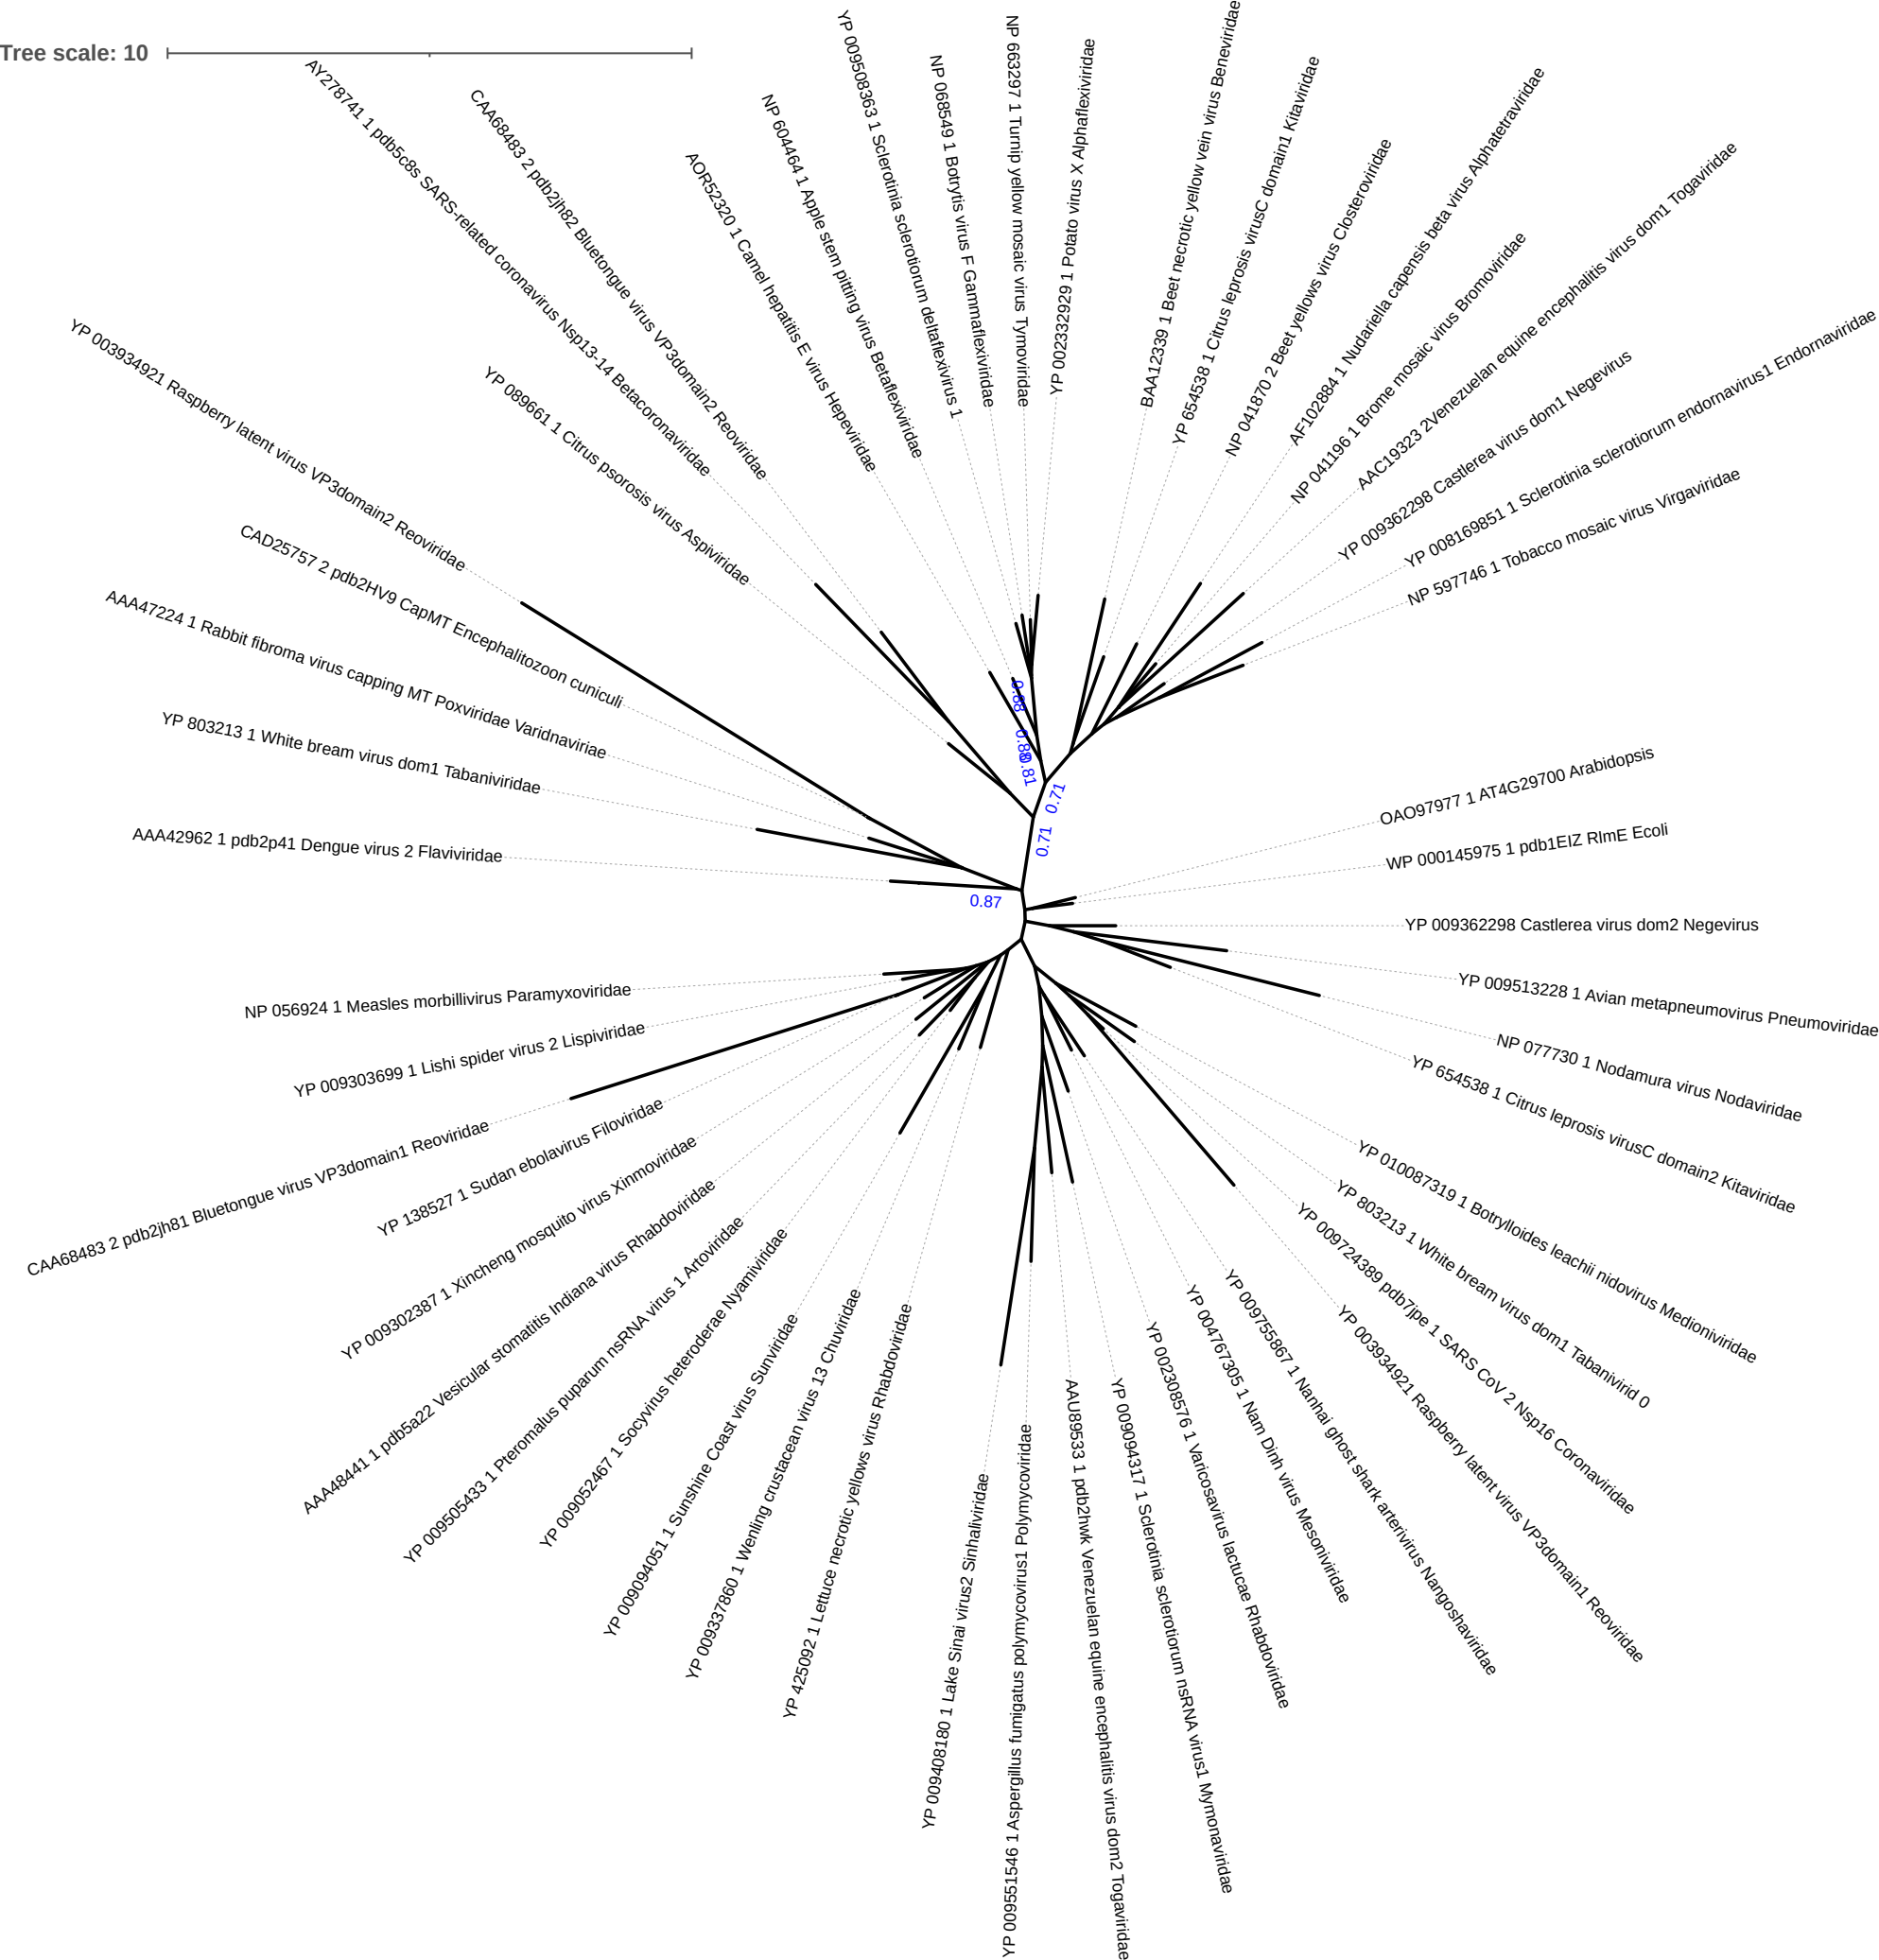

Supplement: s1 [file s1]
